# Supplementary material for: Modeling Methods for Evaluation of Texture Properties of Cooked Germinated Brown Rice Using the Near Infrared Spectra of Uncooked Whole Grain
Source: Preprints.org preprint supplement (doi:10.20944/preprints202311.0770.v1), 2023-11-13
Supplement: Supplementary file 1 [file supplementary]

## Sheet: All
		Hardness		Toughness		Stickiness		Adhesiveness
		calibration	prediction	calibration	prediction	calibration	prediction	calibration	prediction
IS	number	150	38	150	38	150	38	150	38
	min	11.903	12.112	109.685	112.221	-7.671	-7.365	-84.928	-83.786
	max	29.864	29.864	300.547	300.547	-2.841	-2.841	-39.129	-39.129
	mean	20.3887	20.5218	199.746	201.32	-5.39495	-5.35338	-67.0019	-66.6872
	SD	3.31933	4.5148	34.4003	46.0151	1.09927	1.34568	9.82659	13.6831
KST	number	150	38	150	38	150	38	150	38
	min	11.903	15.872	109.685	152.772	-7.671	-7.671	-84.928	-83.786
	max	29.864	29.864	300.547	300.547	-2.841	-3.12225	-39.129	-52.45
	mean	20.3215	20.7873	199.308	203.05	-5.36229	-5.48231	-66.3274	-69.3494
	SD	3.26722	4.66784	33.9955	47.2319	1.13019	1.24712	9.97247	13.2497
sort	number	150	150	150	38	150	38	150	38
	min	11.903	11.903	109.685	112.221	-7.671	-7.365	-84.928	-83.786
	max	29.864	29.864	300.547	275.843	-2.841	-3.124	-39.129	-52.45
	mean	20.4615	20.4615	200.392	198.77	-5.38263	-5.40203	-66.8251	-67.3848
	SD	3.32953	3.32953	34.3893	45.8352	1.10223	1.34021	9.98248	13.2909
cv	number	151	37	151	37	151	37	151	37
	min	11.903	12.112	109.685	112.221	-7.671	-7.365	-84.928	-83.786
	max	29.864	26.317	300.547	300.547	-2.841	-2.841	-39.129	-39.129
	mean	20.3125	20.8364	197.924	208.8	-5.41287	-5.27913	-66.7791	-67.5877
	SD	3.39063	4.32783	33.4952	48.5905	1.09018	1.37089	9.91746	13.5727
IS-cal
IS-pre
KS-cal
KS-pre
sort-cal
sort-pre
cv-cal
cv-pre

## Sheet: Cal-IS
Hardness	Toughness	Stickiness	Adhesiveness			Hardness	Toughness	Stickiness	Adhesiveness
11.903	109.685	-7.671	-84.928		number	150	150	150	150
11.903	109.685	-7.671	-84.928		min	11.903	109.685	-7.671	-84.928
12.112	112.221	-7.365	-83.786		max	29.864	300.547	-2.841	-39.129
12.112	112.221	-7.365	-83.786		mean	20.3931	199.841	-5.39309	-67.0707
15.872	152.772	-7.12	-81.986		SD	3.34584	34.8295	1.10601	9.69242
15.872	152.772	-7.12	-81.986
16.54	158.266	-7.015	-81.154
16.54	158.266	-7.015	-81.154
16.546	160.571	-6.935	-79.121
16.546	160.571	-6.935	-79.121
16.555	162.315	-6.895	-78.859
16.555	162.315	-6.895	-78.859
16.643	164.971	-6.784	-78.345
16.643	164.971	-6.784	-78.345
16.8694	165.498	-6.756	-77.933
16.8694	165.498	-6.756	-77.933
17.014	165.642	-6.749	-77.483
17.014	165.642	-6.749	-77.483
17.082	172.002	-6.59	-77.218
17.082	172.002	-6.59	-77.218
17.883	172.988	-6.569	-76.376
17.883	172.988	-6.569	-76.376
18.034	173.299	-6.55	-76.339
18.034	173.299	-6.55	-76.339
18.239	174.976	-6.469	-76.281
18.239	174.976	-6.469	-76.281
18.242	175.175	-6.393	-75.774
18.242	175.175	-6.393	-75.774
18.397	175.677	-6.183	-74.385
18.397	175.677	-6.183	-74.385
18.459	175.835	-6.153	-74.241
18.459	175.835	-6.153	-74.241
18.543	180.44	-6.131	-73.941
18.543	180.44	-6.131	-73.941
18.553	181.206	-6.111	-73.259
18.553	181.206	-6.111	-73.259
18.762	181.408	-6.079	-72.85
18.762	181.408	-6.079	-72.85
18.763	181.938	-6.078	-72.624
18.763	181.938	-6.078	-72.624
18.795	183.207	-6.071	-72.544
18.795	183.207	-6.071	-72.544
18.998	183.245	-6.029	-72.438
18.998	183.245	-6.029	-72.438
19.002	184.807	-5.91	-70.24
19.002	184.807	-5.91	-70.24
19.024	185.311	-5.826	-69.803
19.024	185.311	-5.826	-69.803
19.275	186.767	-5.787	-69.692
19.275	186.767	-5.787	-69.692
19.37	190.145	-5.776	-69.497
19.37	190.145	-5.776	-69.497
19.544	191.267	-5.759	-69.257
19.544	191.267	-5.759	-69.257
19.597	192.39	-5.757	-69.05
19.597	192.39	-5.757	-69.05
19.602	192.866	-5.75	-68.535
19.602	192.866	-5.75	-68.535
19.673	193.334	-5.6496	-68.043
19.673	193.334	-5.6496	-68.043
19.719	193.783	-5.633	-67.213
19.719	193.783	-5.633	-67.213
19.818	194.476	-5.588	-66.9968
19.818	194.476	-5.588	-66.9968
20.015	195.554	-5.566	-66.87
20.015	195.554	-5.566	-66.87
20.037	195.843	-5.521	-66.684
20.037	195.843	-5.521	-66.684
20.076	195.899	-5.457	-66.045
20.076	195.899	-5.457	-66.045
20.194	197.68	-5.454	-65.891
20.194	197.68	-5.454	-65.891
20.214	199.082	-5.428	-65.874
20.214	199.082	-5.428	-65.874
20.305	199.281	-5.392	-65.747
20.305	199.281	-5.392	-65.747
20.439	199.975	-5.38	-65.673
20.439	199.975	-5.38	-65.673
20.451	200.127	-5.365	-65.577
20.451	200.127	-5.365	-65.577
20.509	200.288	-5.327	-65.52
20.509	200.288	-5.327	-65.52
20.712	201.21	-5.279	-65.457
20.712	201.21	-5.279	-65.457
20.87	203.137	-5.239	-65.342
20.87	203.137	-5.239	-65.342
20.889	203.508	-5.226	-65.3214
20.889	203.508	-5.226	-65.3214
20.915	203.656	-5.165	-65.185
20.915	203.656	-5.165	-65.185
20.98	204.269	-5.127	-65.168
20.98	204.269	-5.127	-65.168
21.072	206.317	-5.116	-64.922
21.072	206.317	-5.116	-64.922
21.081	207.439	-5.099	-64.706
21.081	207.439	-5.099	-64.706
21.104	207.557	-5.099	-64.009
21.104	207.557	-5.099	-64.009
21.207	208.798	-5.09	-63.952
21.207	208.798	-5.09	-63.952
21.515	209.268	-5.069	-63.821
21.515	209.268	-5.069	-63.821
21.533	209.705	-5.007	-63.739
21.533	209.705	-5.007	-63.739
21.612	210.517	-4.978	-63.43
21.612	210.517	-4.978	-63.43
21.713	211.274	-4.852	-63.084
21.713	211.274	-4.852	-63.084
21.812	214.082	-4.808	-62.213
21.812	214.082	-4.808	-62.213
21.845	217.077	-4.793	-61.765
21.845	217.077	-4.793	-61.765
21.854	218.186	-4.762	-61.644
21.854	218.186	-4.762	-61.644
21.901	219.013	-4.727	-61.549
21.901	219.013	-4.727	-61.549
22.058	220.485	-4.649	-61.035
22.058	220.485	-4.649	-61.035
22.174	220.748	-4.629	-61.015
22.174	220.748	-4.629	-61.015
22.28	222.328	-4.49	-60.849
22.28	222.328	-4.49	-60.849
22.764	222.709	-4.479	-60.62
22.764	222.709	-4.479	-60.62
23.264	224.217	-4.405	-60.512
23.264	224.217	-4.405	-60.512
23.29	224.867	-4.297	-60.047
23.29	224.867	-4.297	-60.047
23.464	225.248	-4.277	-59.886
23.464	225.248	-4.277	-59.886
23.4928	225.387	-4.271	-59.733
23.4928	225.387	-4.271	-59.733
23.712	236.145	-4.115	-58.727
23.712	236.145	-4.115	-58.727
23.845	237.75	-4.112	-58.115
23.845	237.75	-4.112	-58.115
23.847	240.799	-4.034	-57.137
23.847	240.799	-4.034	-57.137
24.274	243.36	-3.968	-56.993
24.274	243.36	-3.968	-56.993
24.869	245.786	-3.674	-55.731
24.869	245.786	-3.674	-55.731
25.197	255.744	-3.478	-55.221
25.197	255.744	-3.478	-55.221
26.317	258.906	-3.1808	-53.72
26.317	258.906	-3.1808	-53.72
26.486	275.843	-3.124	-52.45
26.486	275.843	-3.124	-52.45
29.864	300.547	-2.841	-39.129
29.864	300.547	-2.841	-39.129

## Sheet: Val-IS
Hardness	Toughness	Stickiness	Adhesiveness			Hardness	Toughness	Stickiness	Adhesiveness
14.229	131.935	-7.195	-83.668		number	38	38	38	38
14.229	131.935	-7.195	-83.668		min	14.229	131.935	-7.195	-83.668
16.579	164.502	-6.846	-78.857		max	27.933	276.897	-3.12225	-40.692
16.579	164.502	-6.846	-78.857		mean	20.5046	200.945	-5.36075	-66.4156
17.3646	172.315	-6.587	-76.412		SD	4.43584	44.7016	1.32448	14.022
17.3646	172.315	-6.587	-76.412
18.275	175.242	-6.2	-74.466
18.275	175.242	-6.2	-74.466
18.691	181.347	-6.091	-73.179
18.691	181.347	-6.091	-73.179
19	184.343	-6.008	-71.202
19	184.343	-6.008	-71.202
19.4	191.013	-5.771	-69.286
19.4	191.013	-5.771	-69.286
19.68	193.702	-5.639	-67.291
19.68	193.702	-5.639	-67.291
20.04	195.87	-5.516	-66.474
20.04	195.87	-5.516	-66.474
20.323	199.422	-5.389	-65.694
20.323	199.422	-5.389	-65.694
20.843	201.73	-5.273	-65.455
20.843	201.73	-5.273	-65.455
21.009	205.991	-5.121	-65.0044
21.009	205.991	-5.121	-65.0044
21.402	209.168	-5.089	-63.908
21.402	209.168	-5.089	-63.908
21.724	212.644	-4.822	-62.249
21.724	212.644	-4.822	-62.249
22.033	219.382	-4.701	-61.391
22.033	219.382	-4.701	-61.391
23.037	223.594	-4.438	-60.583
23.037	223.594	-4.438	-60.583
23.508	233.449	-4.13	-59.39
23.508	233.449	-4.13	-59.39
24.516	245.402	-3.916	-56.695
24.516	245.402	-3.916	-56.695
27.933	276.897	-3.12225	-40.692
27.933	276.897	-3.12225	-40.692

## Sheet: Cal-kenstone
Hardness	Toughness	Stickiness	Adhesiveness			Hardness	Toughness	Stickiness	Adhesiveness
22.174	217.077	-3.968	-59.733		number	150	150	150	150
20.214	219.013	-4.271	-59.39		min	11.903	109.685	-7.671	-84.928
20.214	219.013	-4.271	-59.39		max	29.864	300.547	-2.841	-39.129
11.903	112.221	-3.916	-39.129		mean	20.3215	199.308	-5.36229	-66.3274
11.903	112.221	-3.916	-39.129		SD	3.26722	33.9955	1.13019	9.97247
12.112	109.685	-4.112	-40.692
12.112	109.685	-4.112	-40.692
18.998	191.267	-5.521	-61.644
21.724	214.082	-4.297	-53.72
21.724	214.082	-4.297	-53.72
20.843	181.347	-6.784	-65.455
20.843	181.347	-6.784	-65.455
21.845	205.991	-6.111	-70.24
23.845	222.709	-4.115	-73.259
23.464	233.449	-5.787	-71.202
23.508	224.217	-4.822	-69.692
23.508	224.217	-4.822	-69.692
24.516	240.799	-4.629	-69.497
24.516	240.799	-4.629	-69.497
19.68	201.73	-4.438	-60.512
19.68	201.73	-4.438	-60.512
20.87	203.508	-3.674	-67.291
20.87	203.508	-3.674	-67.291
20.323	195.899	-3.124	-60.047
20.323	195.899	-3.124	-60.047
23.847	225.387	-4.277	-59.886
23.847	225.387	-4.277	-59.886
18.762	193.334	-5.273	-65.457
18.762	193.334	-5.273	-65.457
18.275	195.554	-5.457	-66.045
18.275	195.554	-5.457	-66.045
16.555	165.642	-5.069	-61.549
19	183.207	-5.099	-72.624
19.597	184.807	-6.008	-62.249
19.597	184.807	-6.008	-62.249
21.854	204.269	-5.099	-69.257
21.854	204.269	-5.099	-69.257
21.009	193.783	-5.279	-58.115
21.009	193.783	-5.279	-58.115
24.274	224.867	-4.405	-65.52
24.274	224.867	-4.405	-65.52
18.239	193.702	-2.841	-61.035
18.239	193.702	-2.841	-61.035
21.081	197.68	-5.392	-55.731
19.4	191.013	-6.078	-76.412
20.915	210.517	-5.239	-78.857
20.915	210.517	-5.239	-78.857
16.579	173.299	-6.846	-64.706
17.082	164.971	-6.59	-65.891
19.673	201.21	-6.2	-63.908
19.673	201.21	-6.2	-63.908
19.544	192.866	-7.12	-73.179
19.544	192.866	-7.12	-73.179
16.8694	175.175	-5.6496	-65.747
17.3646	175.242	-5.771	-65.3214
17.3646	175.242	-5.771	-65.3214
22.764	220.485	-3.1808	-65.0044
22.764	220.485	-3.1808	-65.0044
23.4928	211.274	-3.12225	-66.9968
21.812	207.557	-5.38	-60.849
21.812	207.557	-5.38	-60.849
19.002	172.002	-5.365	-60.583
19.002	172.002	-5.365	-60.583
14.229	131.935	-6.071	-58.727
14.229	131.935	-6.071	-58.727
16.54	152.772	-7.195	-69.05
18.763	175.677	-5.116	-66.87
18.763	175.677	-5.116	-66.87
20.04	183.245	-3.478	-57.137
20.04	183.245	-3.478	-57.137
20.194	200.288	-4.13	-63.952
20.194	200.288	-4.13	-63.952
21.612	209.705	-5.776	-77.218
21.104	200.127	-4.808	-73.941
20.451	203.656	-5.089	-81.986
18.795	172.315	-5.454	-64.009
18.795	172.315	-5.454	-64.009
21.533	209.268	-5.389	-69.286
19.37	174.976	-4.49	-72.85
19.024	184.343	-5.428	-65.673
18.242	165.498	-6.029	-66.474
25.197	255.744	-4.978	-79.121
26.317	258.906	-4.034	-76.376
27.933	275.843	-4.727	-75.774
26.486	276.897	-5.165	-83.786
22.033	236.145	-5.588	-78.859
22.033	236.145	-5.588	-78.859
21.402	199.281	-6.153	-63.821
20.712	222.328	-5.226	-78.345
15.872	164.502	-5.121	-63.084
29.864	300.547	-6.091	-83.668
23.29	243.36	-5.826	-84.928
23.29	243.36	-5.826	-84.928
16.643	158.266	-6.183	-55.221
16.643	158.266	-6.183	-55.221
17.014	160.571	-5.75	-52.45
18.691	180.44	-4.479	-56.695
18.691	180.44	-4.479	-56.695
20.98	203.137	-6.756	-62.213
20.98	203.137	-6.756	-62.213
20.439	208.798	-5.566	-66.684
20.439	208.798	-5.566	-66.684
22.28	225.248	-6.131	-74.385
21.901	218.186	-6.55	-64.922
21.901	218.186	-6.55	-64.922
20.509	212.644	-4.793	-77.483
20.509	212.644	-4.793	-77.483
21.713	219.382	-5.516	-74.241
21.713	219.382	-5.516	-74.241
23.037	237.75	-7.365	-77.933
23.037	237.75	-7.365	-77.933
21.515	209.168	-6.895	-72.438
21.515	209.168	-6.895	-72.438
22.058	220.748	-7.671	-69.803
20.889	207.439	-4.649	-74.466
20.889	207.439	-4.649	-74.466
24.869	245.786	-6.587	-81.154
24.869	245.786	-6.587	-81.154
23.712	245.402	-7.015	-76.339
23.712	245.402	-7.015	-76.339
23.264	223.594	-6.469	-72.544
23.264	223.594	-6.469	-72.544
21.207	206.317	-6.569	-76.281
21.207	206.317	-6.569	-76.281
19.818	194.476	-4.701	-68.535
20.305	199.082	-6.393	-61.015
20.305	199.082	-6.393	-61.015
20.015	195.843	-6.935	-60.62
20.015	195.843	-6.935	-60.62
20.037	192.39	-5.639	-65.874
20.037	192.39	-5.639	-65.874
20.076	199.422	-5.757	-67.213
20.076	199.422	-5.757	-67.213
21.072	199.975	-5.633	-65.577
19.275	195.87	-5.09	-63.43
19.275	195.87	-5.09	-63.43
18.397	190.145	-6.749	-68.043
18.397	190.145	-6.749	-68.043
19.719	185.311	-5.127	-65.342
19.719	185.311	-5.127	-65.342
18.034	181.408	-5.007	-61.391
18.034	181.408	-5.007	-61.391
18.543	181.206	-5.91	-65.185
16.546	162.315	-4.852	-56.993
16.546	162.315	-4.852	-56.993
18.459	175.835	-5.759	-63.739
18.459	175.835	-5.759	-63.739
17.883	172.988	-5.327	-61.765
18.553	181.938	-4.762	-65.168
18.553	181.938	-4.762	-65.168

## Sheet: Val-kenstone
Hardness	Toughness	Stickiness	Adhesiveness			Hardness	Toughness	Stickiness	Adhesiveness
17.082	164.971	-6.59	-65.891		number	38	38	38	38
17.014	160.571	-5.75	-52.45		min	15.872	152.772	-7.671	-83.786
15.872	164.502	-5.121	-63.084		max	29.864	300.547	-3.12225	-52.45
21.845	205.991	-6.111	-70.24		mean	20.7873	203.05	-5.48231	-69.3494
21.402	199.281	-6.153	-63.821		SD	4.66784	47.2319	1.24712	13.2497
23.845	222.709	-4.115	-73.259
29.864	300.547	-6.091	-83.668
19.4	191.013	-6.078	-76.412
19	183.207	-5.099	-72.624
20.451	203.656	-5.089	-81.986
21.533	209.268	-5.389	-69.286
18.998	191.267	-5.521	-61.644
22.28	225.248	-6.131	-74.385
23.464	233.449	-5.787	-71.202
16.555	165.642	-5.069	-61.549
19.602	186.767	-6.079	-65.694
26.317	258.906	-4.034	-76.376
18.543	181.206	-5.91	-65.185
27.933	275.843	-4.727	-75.774
19.024	184.343	-5.428	-65.673
21.104	200.127	-4.808	-73.941
19.818	194.476	-4.701	-68.535
19.602	186.767	-6.079	-65.694
16.54	152.772	-7.195	-69.05
20.712	222.328	-5.226	-78.345
23.4928	211.274	-3.12225	-66.9968
22.058	220.748	-7.671	-69.803
21.081	197.68	-5.392	-55.731
16.579	173.299	-6.846	-64.706
21.612	209.705	-5.776	-77.218
21.072	199.975	-5.633	-65.577
16.8694	175.175	-5.6496	-65.747
18.242	165.498	-6.029	-66.474
25.197	255.744	-4.978	-79.121
17.883	172.988	-5.327	-61.765
19.37	174.976	-4.49	-72.85
22.174	217.077	-3.968	-59.733
26.486	276.897	-5.165	-83.786

## Sheet: Cal-sort
Hardness	Toughness	Stickiness	Adhesiveness			Hardness	Toughness	Stickiness	Adhesiveness
11.903	109.685	-7.671	-84.928		number	150	150	150	150
11.903	109.685	-7.671	-84.928		min	11.903	109.685	-7.671	-84.928
14.229	131.935	-7.195	-83.668		max	29.864	300.547	-2.841	-39.129
14.229	131.935	-7.195	-83.668		mean	20.4615	200.392	-5.38263	-66.8251
15.872	152.772	-7.12	-81.986		SD	3.32953	34.3893	1.10223	9.98248
15.872	152.772	-7.12	-81.986
16.54	158.266	-7.015	-81.154
16.54	158.266	-7.015	-81.154
16.546	160.571	-6.935	-79.121
16.546	160.571	-6.935	-79.121
16.579	164.502	-6.846	-78.857
16.579	164.502	-6.846	-78.857
16.643	164.971	-6.784	-78.345
16.643	164.971	-6.784	-78.345
16.8694	165.498	-6.756	-77.933
16.8694	165.498	-6.756	-77.933
17.014	165.642	-6.749	-77.483
17.014	165.642	-6.749	-77.483
17.3646	172.315	-6.587	-76.412
17.3646	172.315	-6.587	-76.412
17.883	172.988	-6.569	-76.376
17.883	172.988	-6.569	-76.376
18.034	173.299	-6.55	-76.339
18.034	173.299	-6.55	-76.339
18.239	174.976	-6.469	-76.281
18.239	174.976	-6.469	-76.281
18.275	175.242	-6.2	-74.466
18.275	175.242	-6.2	-74.466
18.397	175.677	-6.183	-74.385
18.397	175.677	-6.183	-74.385
18.459	175.835	-6.153	-74.241
18.459	175.835	-6.153	-74.241
18.543	180.44	-6.131	-73.941
18.543	180.44	-6.131	-73.941
18.691	181.347	-6.091	-73.179
18.691	181.347	-6.091	-73.179
18.762	181.408	-6.079	-72.85
18.762	181.408	-6.079	-72.85
18.763	181.938	-6.078	-72.624
18.763	181.938	-6.078	-72.624
18.795	183.207	-6.071	-72.544
18.795	183.207	-6.071	-72.544
19	184.343	-6.008	-71.202
19	184.343	-6.008	-71.202
19.002	184.807	-5.91	-70.24
19.002	184.807	-5.91	-70.24
19.024	185.311	-5.826	-69.803
19.024	185.311	-5.826	-69.803
19.275	186.767	-5.787	-69.692
19.275	186.767	-5.787	-69.692
19.4	191.013	-5.771	-69.286
19.4	191.013	-5.771	-69.286
19.544	191.267	-5.759	-69.257
19.544	191.267	-5.759	-69.257
19.597	192.39	-5.757	-69.05
19.597	192.39	-5.757	-69.05
19.602	192.866	-5.75	-68.535
19.602	192.866	-5.75	-68.535
19.68	193.702	-5.639	-67.291
19.68	193.702	-5.639	-67.291
19.719	193.783	-5.633	-67.213
19.719	193.783	-5.633	-67.213
19.818	194.476	-5.588	-66.9968
19.818	194.476	-5.588	-66.9968
20.015	195.554	-5.566	-66.87
20.015	195.554	-5.566	-66.87
20.04	195.87	-5.516	-66.474
20.04	195.87	-5.516	-66.474
20.076	195.899	-5.457	-66.045
20.076	195.899	-5.457	-66.045
20.194	197.68	-5.454	-65.891
20.194	197.68	-5.454	-65.891
20.214	199.082	-5.428	-65.874
20.214	199.082	-5.428	-65.874
20.323	199.422	-5.389	-65.694
20.323	199.422	-5.389	-65.694
20.439	199.975	-5.38	-65.673
20.439	199.975	-5.38	-65.673
20.451	200.127	-5.365	-65.577
20.451	200.127	-5.365	-65.577
20.509	200.288	-5.327	-65.52
20.509	200.288	-5.327	-65.52
20.843	201.73	-5.273	-65.455
20.843	201.73	-5.273	-65.455
20.87	203.137	-5.239	-65.342
20.87	203.137	-5.239	-65.342
20.889	203.508	-5.226	-65.3214
20.889	203.508	-5.226	-65.3214
20.915	203.656	-5.165	-65.185
20.915	203.656	-5.165	-65.185
21.009	205.991	-5.121	-65.0044
21.009	205.991	-5.121	-65.0044
21.072	206.317	-5.116	-64.922
21.072	206.317	-5.116	-64.922
21.081	207.439	-5.099	-64.706
21.081	207.439	-5.099	-64.706
21.104	207.557	-5.099	-64.009
21.104	207.557	-5.099	-64.009
21.402	209.168	-5.089	-63.908
21.402	209.168	-5.089	-63.908
21.515	209.268	-5.069	-63.821
21.515	209.268	-5.069	-63.821
21.533	209.705	-5.007	-63.739
21.533	209.705	-5.007	-63.739
21.612	210.517	-4.978	-63.43
21.612	210.517	-4.978	-63.43
21.724	212.644	-4.822	-62.249
21.724	212.644	-4.822	-62.249
21.812	214.082	-4.808	-62.213
21.812	214.082	-4.808	-62.213
21.845	217.077	-4.793	-61.765
21.845	217.077	-4.793	-61.765
21.854	218.186	-4.762	-61.644
21.854	218.186	-4.762	-61.644
22.033	219.382	-4.701	-61.391
22.033	219.382	-4.701	-61.391
22.058	220.485	-4.649	-61.035
22.058	220.485	-4.649	-61.035
22.174	220.748	-4.629	-61.015
22.174	220.748	-4.629	-61.015
22.28	222.328	-4.49	-60.849
22.28	222.328	-4.49	-60.849
23.037	223.594	-4.438	-60.583
23.037	223.594	-4.438	-60.583
23.264	224.217	-4.405	-60.512
23.264	224.217	-4.405	-60.512
23.29	224.867	-4.297	-60.047
23.29	224.867	-4.297	-60.047
23.464	225.248	-4.277	-59.886
23.464	225.248	-4.277	-59.886
23.508	233.449	-4.13	-59.39
23.508	233.449	-4.13	-59.39
23.712	236.145	-4.115	-58.727
23.712	236.145	-4.115	-58.727
23.845	237.75	-4.112	-58.115
23.845	237.75	-4.112	-58.115
23.847	240.799	-4.034	-57.137
23.847	240.799	-4.034	-57.137
24.516	245.402	-3.916	-56.695
24.516	245.402	-3.916	-56.695
24.869	245.786	-3.674	-55.731
24.869	245.786	-3.674	-55.731
25.197	255.744	-3.478	-55.221
25.197	255.744	-3.478	-55.221
26.317	258.906	-3.1808	-53.72
26.317	258.906	-3.1808	-53.72
27.933	276.897	-3.12225	-40.692
27.933	276.897	-3.12225	-40.692
29.864	300.547	-2.841	-39.129
29.864	300.547	-2.841	-39.129

## Sheet: Val-sort
Hardness	Toughness	Stickiness	Adhesiveness			Hardness	Toughness	Stickiness	Adhesiveness
11.903	112.221	-7.365	-83.786		number	150	38	38	38
11.903	112.221	-7.365	-83.786		min	11.903	112.221	-7.365	-83.786
14.229	162.315	-6.895	-78.859		max	29.864	275.843	-3.124	-52.45
14.229	162.315	-6.895	-78.859		mean	20.4615	198.77	-5.40203	-67.3848
15.872	172.002	-6.59	-77.218		SD	3.32953	45.8352	1.34021	13.2909
15.872	172.002	-6.59	-77.218
16.54	175.175	-6.393	-75.774
16.54	175.175	-6.393	-75.774
16.546	181.206	-6.111	-73.259
16.546	181.206	-6.111	-73.259
16.579	183.245	-6.029	-72.438
16.579	183.245	-6.029	-72.438
16.643	190.145	-5.776	-69.497
16.643	190.145	-5.776	-69.497
16.8694	193.334	-5.6496	-68.043
16.8694	193.334	-5.6496	-68.043
17.014	195.843	-5.521	-66.684
17.014	195.843	-5.521	-66.684
17.3646	199.281	-5.392	-65.747
17.3646	199.281	-5.392	-65.747
17.883	201.21	-5.279	-65.457
17.883	201.21	-5.279	-65.457
18.034	204.269	-5.127	-65.168
18.034	204.269	-5.127	-65.168
18.239	208.798	-5.09	-63.952
18.239	208.798	-5.09	-63.952
18.275	211.274	-4.852	-63.084
18.275	211.274	-4.852	-63.084
18.397	219.013	-4.727	-61.549
18.397	219.013	-4.727	-61.549
18.459	222.709	-4.479	-60.62
18.459	222.709	-4.479	-60.62
18.543	225.387	-4.271	-59.733
18.543	225.387	-4.271	-59.733
18.691	243.36	-3.968	-56.993
18.691	243.36	-3.968	-56.993
18.762	275.843	-3.124	-52.45
18.762	275.843	-3.124	-52.45
18.763
18.763
18.795
18.795
19
19
19.002
19.002
19.024
19.024
19.275
19.275
19.4
19.4
19.544
19.544
19.597
19.597
19.602
19.602
19.68
19.68
19.719
19.719
19.818
19.818
20.015
20.015
20.04
20.04
20.076
20.076
20.194
20.194
20.214
20.214
20.323
20.323
20.439
20.439
20.451
20.451
20.509
20.509
20.843
20.843
20.87
20.87
20.889
20.889
20.915
20.915
21.009
21.009
21.072
21.072
21.081
21.081
21.104
21.104
21.402
21.402
21.515
21.515
21.533
21.533
21.612
21.612
21.724
21.724
21.812
21.812
21.845
21.845
21.854
21.854
22.033
22.033
22.058
22.058
22.174
22.174
22.28
22.28
23.037
23.037
23.264
23.264
23.29
23.29
23.464
23.464
23.508
23.508
23.712
23.712
23.845
23.845
23.847
23.847
24.516
24.516
24.869
24.869
25.197
25.197
26.317
26.317
27.933
27.933
29.864
29.864

## Sheet: Cal-cv
Hardness	Toughness	Stickiness	Adhesiveness			Hardness	Toughness	Stickiness	Adhesiveness
22.174	217.077	-3.968	-59.733		number	151	151	151	151
22.174	217.077	-3.968	-59.733		min	11.903	109.685	-7.671	-84.928
20.214	219.013	-4.271	-59.39		max	29.864	300.547	-2.841	-39.129
20.214	219.013	-4.271	-39.129		mean	20.3125	197.924	-5.41287	-66.7791
11.903	112.221	-3.916	-40.692		SD	3.39063	33.4952	1.09018	9.91746
11.903	109.685	-4.112	-40.692
12.112	109.685	-5.521	-61.644
18.998	191.267	-5.521	-53.72
21.724	191.267	-4.297	-53.72
21.724	214.082	-6.784	-65.455
20.843	214.082	-6.784	-65.455
20.843	181.347	-6.111	-70.24
21.845	181.347	-6.111	-70.24
21.845	205.991	-4.115	-73.259
23.845	222.709	-4.115	-71.202
23.464	222.709	-5.787	-71.202
23.464	233.449	-5.787	-69.692
23.508	233.449	-4.822	-69.692
23.508	224.217	-4.822	-69.497
24.516	240.799	-4.629	-60.512
24.516	240.799	-4.629	-60.512
19.68	201.73	-4.438	-67.291
20.87	201.73	-4.438	-60.047
20.87	203.508	-3.674	-59.886
20.323	203.508	-3.674	-59.886
20.323	195.899	-3.124	-65.457
18.762	195.899	-5.273	-65.457
18.762	225.387	-5.457	-66.045
18.275	193.334	-5.457	-66.045
18.275	195.554	-5.069	-61.549
16.555	195.554	-5.069	-61.549
16.555	165.642	-5.099	-72.624
19	183.207	-6.008	-72.624
19.597	183.207	-6.008	-62.249
21.854	184.807	-5.099	-62.249
21.009	184.807	-5.099	-69.257
21.009	204.269	-4.405	-69.257
24.274	193.783	-4.405	-58.115
18.239	193.783	-2.841	-58.115
18.239	224.867	-5.392	-65.52
21.081	224.867	-5.392	-65.52
19.4	193.702	-6.078	-61.035
19.4	193.702	-6.078	-61.035
20.915	197.68	-5.239	-55.731
16.579	197.68	-5.239	-55.731
16.579	191.013	-6.846	-76.412
17.082	191.013	-6.59	-76.412
17.082	210.517	-6.59	-78.857
19.673	210.517	-6.2	-78.857
19.673	173.299	-6.2	-64.706
19.544	173.299	-7.12	-65.891
19.544	164.971	-5.6496	-63.908
16.8694	192.866	-5.771	-63.908
16.8694	192.866	-5.771	-73.179
17.3646	175.175	-3.1808	-65.747
17.3646	175.175	-3.1808	-65.3214
22.764	175.242	-3.12225	-65.3214
23.4928	220.485	-5.38	-65.0044
21.812	211.274	-5.365	-66.9968
21.812	211.274	-6.071	-60.849
19.002	207.557	-6.071	-60.849
19.002	207.557	-7.195	-60.583
14.229	131.935	-7.195	-60.583
14.229	131.935	-5.116	-58.727
16.54	152.772	-5.116	-58.727
18.763	152.772	-6.079	-69.05
19.602	175.677	-6.079	-69.05
19.602	175.677	-3.478	-66.87
20.04	186.767	-3.478	-66.87
20.194	186.767	-4.13	-65.694
21.612	183.245	-4.13	-57.137
21.612	183.245	-5.776	-57.137
21.104	200.288	-5.776	-63.952
21.104	209.705	-4.808	-63.952
20.451	209.705	-4.808	-77.218
20.451	200.127	-5.089	-77.218
18.795	200.127	-5.089	-73.941
19.37	203.656	-5.454	-73.941
19.37	203.656	-5.454	-81.986
19.024	172.315	-5.389	-64.009
18.242	172.315	-5.389	-64.009
18.242	209.268	-4.49	-69.286
25.197	174.976	-4.49	-69.286
25.197	174.976	-5.428	-72.85
27.933	184.343	-6.029	-72.85
27.933	184.343	-6.029	-65.673
26.486	165.498	-4.978	-65.673
26.486	165.498	-4.978	-66.474
22.033	255.744	-4.034	-66.474
22.033	258.906	-4.727	-79.121
21.402	275.843	-4.727	-79.121
20.712	275.843	-5.165	-76.376
20.712	276.897	-5.588	-75.774
15.872	236.145	-5.588	-75.774
29.864	199.281	-6.153	-83.786
29.864	222.328	-6.153	-78.859
23.29	164.502	-5.226	-78.859
23.29	164.502	-6.091	-63.821
16.643	300.547	-5.826	-63.821
16.643	158.266	-5.826	-78.345
17.014	158.266	-6.183	-63.084
17.014	160.571	-5.75	-63.084
18.691	160.571	-5.75	-83.668
18.691	180.44	-4.479	-83.668
20.98	203.137	-4.479	-84.928
20.439	203.137	-6.756	-84.928
20.439	208.798	-6.756	-55.221
22.28	208.798	-5.566	-52.45
22.28	225.248	-6.131	-52.45
21.901	225.248	-6.131	-56.695
21.901	218.186	-6.55	-56.695
20.509	212.644	-4.793	-62.213
20.509	219.382	-4.793	-62.213
21.713	237.75	-5.516	-74.385
21.713	237.75	-7.365	-74.385
23.037	209.168	-6.895	-64.922
23.037	209.168	-6.895	-77.483
21.515	220.748	-7.671	-77.483
21.515	207.439	-7.671	-74.241
20.889	207.439	-4.649	-77.933
24.869	245.786	-4.649	-77.933
24.869	245.786	-6.587	-72.438
23.712	245.402	-6.587	-72.438
23.264	223.594	-7.015	-69.803
23.264	223.594	-7.015	-74.466
21.207	206.317	-6.469	-81.154
21.207	194.476	-6.469	-81.154
19.818	194.476	-6.569	-76.339
20.305	195.843	-4.701	-76.339
20.015	195.843	-4.701	-68.535
20.037	192.39	-6.393	-68.535
20.076	199.422	-6.935	-61.015
20.076	199.422	-6.935	-60.62
21.072	199.975	-5.639	-60.62
21.072	199.975	-5.757	-65.874
19.275	195.87	-5.757	-65.874
19.275	195.87	-5.09	-67.213
18.397	190.145	-5.09	-65.577
18.397	190.145	-6.749	-63.43
18.034	185.311	-5.127	-63.43
18.034	181.408	-5.127	-68.043
18.543	181.408	-5.007	-65.342
18.543	181.206	-5.007	-61.391
16.546	181.206	-5.91	-61.391
16.546	162.315	-5.91	-65.185
18.459	175.835	-4.852	-56.993
18.459	175.835	-4.852	-63.739
17.883	172.988	-5.759	-61.765
17.883	172.988	-5.759	-61.765
18.553	181.938	-5.327	-65.168
18.553	181.938	-4.762	-65.168

## Sheet: Val-cv
Hardness	Toughness	Stickiness	Adhesiveness			Hardness	Toughness	Stickiness	Adhesiveness
12.112	112.221	-3.916	-59.39		number	37	37	37	37
18.998	205.991	-4.112	-39.129		min	12.112	112.221	-7.365	-83.786
23.845	224.217	-4.297	-61.644		max	26.317	300.547	-2.841	-39.129
19.68	225.387	-3.124	-73.259		mean	20.8364	208.8	-5.27913	-67.5877
23.847	193.334	-4.277	-69.497		SD	4.32783	48.5905	1.37089	13.5727
23.847	165.642	-4.277	-67.291
19	204.269	-5.273	-60.047
19.597	164.971	-5.099	-64.706
21.854	201.21	-5.279	-65.891
24.274	201.21	-5.279	-73.179
21.081	175.242	-2.841	-65.747
20.915	220.485	-6.846	-65.0044
22.764	172.002	-7.12	-66.9968
23.4928	172.002	-5.6496	-65.694
16.54	200.288	-3.12225	-81.986
18.763	209.268	-5.38	-76.376
20.04	255.744	-5.365	-83.786
20.194	258.906	-5.428	-78.345
18.795	276.897	-4.034	-55.221
21.533	236.145	-5.165	-66.684
21.533	199.281	-5.226	-66.684
19.024	222.328	-5.121	-64.922
26.317	300.547	-5.121	-74.241
26.317	243.36	-6.091	-69.803
21.402	243.36	-6.183	-74.466
15.872	180.44	-5.566	-72.544
20.98	218.186	-6.55	-72.544
22.058	212.644	-5.516	-76.281
22.058	219.382	-7.365	-76.281
20.889	220.748	-6.569	-61.015
23.712	245.402	-6.393	-67.213
19.818	206.317	-5.639	-65.577
20.305	199.082	-5.633	-68.043
20.015	199.082	-5.633	-65.342
20.037	192.39	-6.749	-65.185
19.719	185.311	-5.327	-56.993
19.719	162.315	-4.762	-63.739
